# Supplementary material for: Interplay of Demographic Influences, Clinical Manifestations, and Longitudinal Profile of Laboratory Parameters in the Progression of SARS-CoV-2 Infection: Insights from the Saudi Population
Source: MDPI journal article supplement (doi:10.3390/microorganisms12051022), 2024-05-18
Supplement: s1 [file s1]

**Table S1.** Seven-Day Laboratory Parameter Trends in COVID-19: Distinguishing Moderate from Severe Cases.

| Characteristic                          | Day 1, n=137       |                    |         | Day 2, n= 94       |                    |         | Day 3, n=75      |                 |         | Day 7, n=49        |                    |         |
|-----------------------------------------|--------------------|--------------------|---------|--------------------|--------------------|---------|------------------|-----------------|---------|--------------------|--------------------|---------|
|                                         | Moderate, n = 71   | Severe, n = 66     | p-value | Moderate, n = 55   | Severe, n = 39     | p-value | Moderate, n = 35 | Severe, n = 40  | p-value | Moderate, n =11    | Severe, n = 38     | p-value |
| Hemoglobin (g/L)                        | 127(120-136)       | 121(107-133)       | 0.027   | 127(117-139)       | 121(114-135)       | 0.25    | 130(119-142)     | 125(110-137)    | 0.078   | 124(121-135)       | 120(102-139)       | 0.39    |
| Hematocrit (%)                          | 0.39(0.36-0.41)    | 0.37(0.32-0.40)    | 0.04    | 0.38(0.36-0.42)    | 0.37(0.34-0.41)    | 0.19    | 0.40(0.37-0.42)  | 0.38(0.33-0.42) | 0.1     | 0.40(0.37-0.41)    | 0.38(0.31-0.43)    | 0.47    |
| Whit Blood Cells (× 10 <sup>9</sup> /L) | 7.2(5.5-8.7)       | 8.6(6.7-12.1)      | 0.002   | 7.6(5.8-9.6)       | 9.8(7.5-12.1)      | 0.021   | 8.5(5.8-10.1)    | 9.5(7.1-12.2)   | 0.036   | 10.3(7.9-12.0)     | 12.9(9.5-16.9)     | 0.069   |
| Platelets (× 10 <sup>9</sup> /L)        | 291(216-352)       | 262(203-358)       | 0.42    | 321(245-391)       | 288(203-334)       | 0.1     | 321(264-396)     | 291(206-392)    | 0.35    | 485(403-538)       | 337(266-440)       | 0.017   |
| Neutrophils (× 10 <sup>9</sup> /L)      | 5.3(3.5-6.8)       | 6.7(4.7-7.9)       | 0.025   | 5.4(4.1-6.8)       | 7.3(6.0-9.4)       | 0.013   | 6.2(3.7-7.2)     | 6.6(5.9-9.0)    | 0.1     | 7.0(5.3-8.3)       | 10.6(8.9-12.4)     | 0.019   |
| Lymphocytes (× 10 <sup>9</sup> /L)      | 1.14(0.86-1.57)    | 0.85(0.69-1.14)    | 0.024   | 1.39(0.94-1.68)    | 0.89(0.69-1.26)    | 0.009   | 1.55(1.02-2.04)  | 0.77(0.59-1.16) | 0.003   | 1.37(1.02-2.19)    | 0.90(0.67-1.55)    | 0.16    |
| Prothrombin Time (seconds)              | 10.90(10.40-11.30) | 11.50(10.88-12.33) | <0.001  | 10.90(10.50-11.40) | 11.25(10.90-12.55) | 0.053   | 11.0(10.6-11.5)  | 11.5(10.9-13.0) | 0.051   | 11.40(11.05-12.25) | 11.70(11.10-13.70) | 0.48    |
| The International Normalized Ratio      | 1.00(0.95-1.04)    | 1.06(1.00-1.14)    | <0.001  | 1.00(0.96-1.05)    | 1.04(1.00-1.16)    | 0.082   | 1.01(0.98-1.06)  | 1.06(1.00-1.21) | 0.066   | 1.05(1.02-1.13)    | 1.08(1.02-1.28)    | 0.48    |
| Bilirubin (umol/L)                      | 8.3(6.8-10.3)      | 8.2(6.3-13.6)      | 0.62    | 8.4(7.6-11.9)      | 9.1(7.8-13.0)      | 0.86    | 8.8(7.2-11.3)    | 9.9(7.0-13.1)   | 0.8     | 7.5(7.0-8.1)       | 16.0(9.8-19.1)     | 0.018   |
| Aspartate Aminotransferase (U/L)        | 39(30-65)          | 47(31-67)          | 0.51    | 46(28-57)          | 40(37-86)          | 0.26    | 41(34-52)        | 45(40-76)       | 0.3     | 21(19-21)          | 35(29-55)          | 0.006   |
| Glucose (mmol/L)                        | 11.6(7.0-16.4)     | 10.4(7.9-13.8)     | 0.54    | 12.6(6.3-14.6)     | 9.4(7.8-13.8)      | 0.87    | 13.3(9.0-17.3)   | 9.3(7.4-11.9)   | 0.024   | 9.1(7.4-12.1)      | 9.6(8.0-12.2)      | 0.76    |
| Blood Urea Nitrogen (mmol/L)            | 5(4-7)             | 8(6-13)            | <0.001  | 5.4(3.8-7.0)       | 8.5(5.7-11.8)      | <0.001  | 5.4(3.3-7.6)     | 9.8(7.0-14.6)   | <0.001  | 5(4-8)             | 12(9-19)           | <0.001  |
| Lactate Dehydrogenase (U/L)             | 404(298-503)       | 610(503-728)       | 0.003   | 414(336-537)       | 696(587-815)       | <0.001  | 404(333-468)     | 558(529-617)    | 0.023   |                    |                    | >0.99   |

|                                                      |           |            |        |           |            |        |           |            |       |           |            |      |
|------------------------------------------------------|-----------|------------|--------|-----------|------------|--------|-----------|------------|-------|-----------|------------|------|
| Creatinine (U/L)                                     | 62(56-71) | 83(62-133) | <0.001 | 63(56-68) | 84(65-123) | <0.001 | 64(58-68) | 84(64-194) | 0.001 | 63(60-71) | 75(63-141) | 0.15 |
| Median (IQR)                                         |           |            |        |           |            |        |           |            |       |           |            |      |
| Wilcoxon rank sum test; Wilcoxon rank sum exact test |           |            |        |           |            |        |           |            |       |           |            |      |
