# Supplementary material for: Interplay of Demographic Influences, Clinical Manifestations, and Longitudinal Profile of Laboratory Parameters in the Progression of SARS-CoV-2 Infection: Insights from the Saudi Population
Source: MDPI journal article supplement (doi:10.3390/microorganisms12051022), 2024-05-18
Supplement: s1 [file s1]

**Table S2.** Multivariate Analysis of Risk Factors for Severity in COVID-19 Patients

| <b>Independent Variable</b>          | <b>aOR</b> | <b>95% CL</b> |        | <b>Univariate p-value</b> | <b>Global p-value</b> |
|--------------------------------------|------------|---------------|--------|---------------------------|-----------------------|
| Gender (REF=Female)                  | NA**       | NA**          | NA**   | 0.9489                    | 0.03489*              |
| Comorbidity (REF=No)                 | NA**       | NA**          | NA**   | 0.8901                    |                       |
| Diabetes (REF=No)                    | 11.6       | NA**          | NA**   | 0.9857                    |                       |
| Hypertension (REF=No)                | 0.082      | NA**          | NA**   | 0.9848                    |                       |
| Age                                  | 2.018      | 0.002         | NA**   | 0.8435                    |                       |
| Haemoglobin (g/L)                    | 1.197      | 0.102         | 13.990 | 0.886                     |                       |
| Haematocrit (%)                      | NA**       | NA**          | NA**   | 0.8464                    |                       |
| White Blood Cell ( $\times 10^9/L$ ) | NA**       | NA**          | NA**   | 0.8536                    |                       |
| Nutrophils ( $\times 10^9/L$ )       | NA**       | NA**          | NA**   | 0.855                     |                       |
| Lymphocytes ( $\times 10^9/L$ )      | NA**       | NA**          | NA**   | 0.8372                    |                       |
| Prothrombin Time (seconds)           | NA**       | NA**          | NA**   | 0.9253                    |                       |
| The International Normalized Ratio   | NA**       | NA**          | NA**   | 0.9536                    |                       |
| Blood Urea Nitrogen (mmol/L)         | 0.565      | NA**          | NA**   | 0.983                     |                       |
| Lactate Dehydrogenase (U/L)          | 1.005      | 0.611         | 1.652  | 0.9856                    |                       |
| Creatinine (umol/L)                  | 1.007      | 0.876         | 1.15   | 0.9173                    |                       |

\* Statistically significant value

\*\* Not available, not enough sample size distributed to calculate ORs.
